# Supplementary material
Source: PubMed Central journal article supplement (PMC3182034)
Supplement: Supp_Data.pdf [file Supp_Data.pdf]

# Supplementary Data

## Supplementary Methods

### Western blot methodology

Differentially expressed proteins [lung-derived mesenchymal stromal cells (L-MSCs) vs. bone marrow-derived mesenchymal stromal cells (BM-MSCs)] were further corroborated using immunoblots. Cells were lysed in ice cold buffer (T-Per, Tissue Protein Extraction Reagent; Pierce) with protease inhibitors added (Roche Complete Mini Protease Inhibitor Tab with ethylenediaminetetraacetic acid; Roche). Protein concentrations were measured using BCA assay (Thermo-Scientific/Pierce). The cell lysate was further prepared in Laemmli sample buffer with 2-mercaptoethanol added (5%), and heated to 95°C. The resulting sample (30 µg/sample) was loaded into each well of a 1MM 4%–20% Tris-glycine gel (Criterion Gel; BioRad) and separation was performed at 100–120 V for 90 min. Proteins were transferred onto polyvinylidene fluoride (PVDF) blotting paper at 2°C–4°C. Efficiency of transfer was confirmed by both Ponceau S red staining (PVDF membrane) and Coomassie blue (sodium dodecyl sulfate-gel). After blocking PVDF membrane for 1–2 h at 21°C with 4% casein, samples were incubated with primary antibodies (intercellular adhesion molecule 1 [ICAM-1], platelet derived growth factor receptor alpha [PDGFR $\alpha$ ], or Itg  $\alpha$ 2, 1:500–1,000) overnight (4°C). Detection was performed using peroxidase-linked secondary antibodies (Vector Laboratories, Elite ABC kit; product # PK-6101) and a diaminobenzidine (DAB) reporter system (Vector laboratories; product # SK-4100). All samples/PVDF were reprobed for beta-actin antibody (1:20,000 dilution) as a protein loading control for normalization of signals.

### Quantitative real-time PCR methodology

Lung tissue RNA was isolated by flooding the lung intratracheally with RNeasy lysis solution (Qiagen #76104), followed by storage of lung tissue samples in RNeasy lysis solution at –80°C. Total RNA was isolated using a combination of TRIzol reagent (Invitrogen), and the Purelink RNA mini kit (Invitrogen) according to the manufacturer's directions. Total RNA concentrations, A260/A280 ratios, and RNA integrity number (RIN) values were determined using an Agilent 2100 Bioanalyzer (Agilent Technologies). Cultured L-MSCs or BM-MSCs ( $0.5 \times 10^6$ ) were stored in 300 µl RNA-Protect Cell Reagent (Qiagen). Total RNA was prepared from the cell pellet using the Purelink RNA mini kit (Invitrogen) and homogenizer spin columns according to the manufacturer's directions. Total RNA concentrations, A260/A280 ratios, and RIN values were determined using an Agilent 2100 Bioanalyzer (Agilent Technologies). Equal amounts of total RNA from each sample were used for quantitative polymerase chain reaction (qPCR) analysis. First, the samples were subjected to genomic DNA elimination and first strand cDNA synthesis using a commercial kit (RT<sup>2</sup> First Strand Kit; SA Biosciences) to generate the cDNA templates for PCR amplification. Quality control was performed using the SA Biosciences QC qRT-PCR array (SA Biosciences) to test for any inhibition of cDNA synthesis, or presence of genomic DNA contamination. Gene expression

assays were performed using sets of premade mouse primer pairs (SA Biosciences; see Supplementary Tables for primer catalog numbers). qPCR was performed using a Stratagene MX3000P Detection system or ABI7500, and RT<sup>2</sup> qPCR SYBR green PCR Master Mix (SA Biosciences) according to the manufacturer's recommended protocol. Each sample was analyzed in triplicate, normalized using the housekeeping genes *Hprt1*, *Gapdh*, and *GusB*, and relative gene expression was calculated using the comparative C<sub>t</sub> method [1].

### Immunocytochemistry and immunohistochemistry

For immunostaining of cryosections, samples were fixed with 2% formalin (2 min) and washed (Tris buffered saline [TBS]) 3 times before a 20 min protein block (Dako), and exposure to the primary antibodies (16 h, 4°C). Detection of the primary antibodies was achieved using donkey anti-mouse Alexa Fluor 488 at 1:200 (30 min at 37°C).

For immunocytochemistry in cultured cells, subconfluent (80%–90%) cells were fixed in methanol (–20°C) and stained without antigen retrieval by incubation with primary rabbit polyclonal anti-mouse antibodies (1:100, 1 h, room temperature [RT]) (Abcam) or monoclonal antibodies (Santa Cruz) against laminin (Ab11575, polyclonal), collagen 1 (Ab34710, polyclonal), collagen IV (Clone 10B7), fibronectin (Clone IST-9), vimentin (Clone RV202), and alpha smooth muscle actin (Ab5694, polyclonal) or respective isotype control antibodies. For detection, species-specific peroxidase-conjugated secondary antibodies (Vector Laboratories) or Alexa 595-conjugated donkey anti-mouse IgG were incubated with samples (37°C, 30 min).

### Flow cytometry reagents

The following antibodies (clones) used to characterize L-MSCs and BM-MSCs were obtained from eBiosciences unless otherwise indicated: CD31/PECAM (MEC13.3; BD), CD45.2 (104), CD14 (Sa2-8), CD44 (IM7, BD), CD73/5'-nucleosidase (TY/11.8), CD90.2/Thy-1 (13H12, BD), CD105/endoglin (MJ7/18), CD 106/VCAM-1 (429), CD166/ALCAM (ALC48), integrins alpha (Itg  $\alpha$ 2 (HMalph2, BD), Itg  $\alpha$ 3 (FAB2787A; R&D Systems), Itg  $\alpha$ 4 (R1-2), Itg  $\alpha$ 5 (HMalph5-1, BD), Itg  $\alpha$ 6 (GoH3), Itg  $\alpha$ 8 (BAF4076, R&D) or Itg  $\alpha$ V (RMV-7), Itg  $\beta$ 1 (HMb.1), Itg  $\beta$ 3 (2C9.G3), Itg  $\beta$ 5 (ALULA, Dean Sheppard, UCSF), Itg  $\beta$ 6 (Amha, Dean Sheppard, UCSF), CD36 (72-1), Sca-1 (D7), flk-1 (Avas2alpha-1, BD), CD34 (MEK14.7, Caltag), CD117/c-kit (2B8, BD), CD47 (miap301), CD56/NCAM (MEM188; Abcam), PDGFR $\alpha$  (APA5), PDGFR $\beta$  (APB5), CD54/ICAM-1 (YN1/1.7.4), ICAM-2/CD102 (3C4), CD146/MCAM (P1H12, Abcam), NGFR/p75/CD271 (H-137, Santa Cruz, Santa Cruz, CA), or CD133/Prominin (13A4), P-selectin/CD62P (K02.3), PSGL1/CD162 (2PH1, BD), E-selectin/CD62E (10E9.6, BD), CD24 (M1/69), Itg  $\beta$ 2/CD18 (M18/2), and CD11a (M17/4), CD11b (M1/70), CD11c (N418), and F4/80 (BM8).

### Reference

1. Pfaffl MW. (2001). A new mathematical model for relative quantification in real-time RT-PCR. *Nucleic Acids Res* 29:e45.

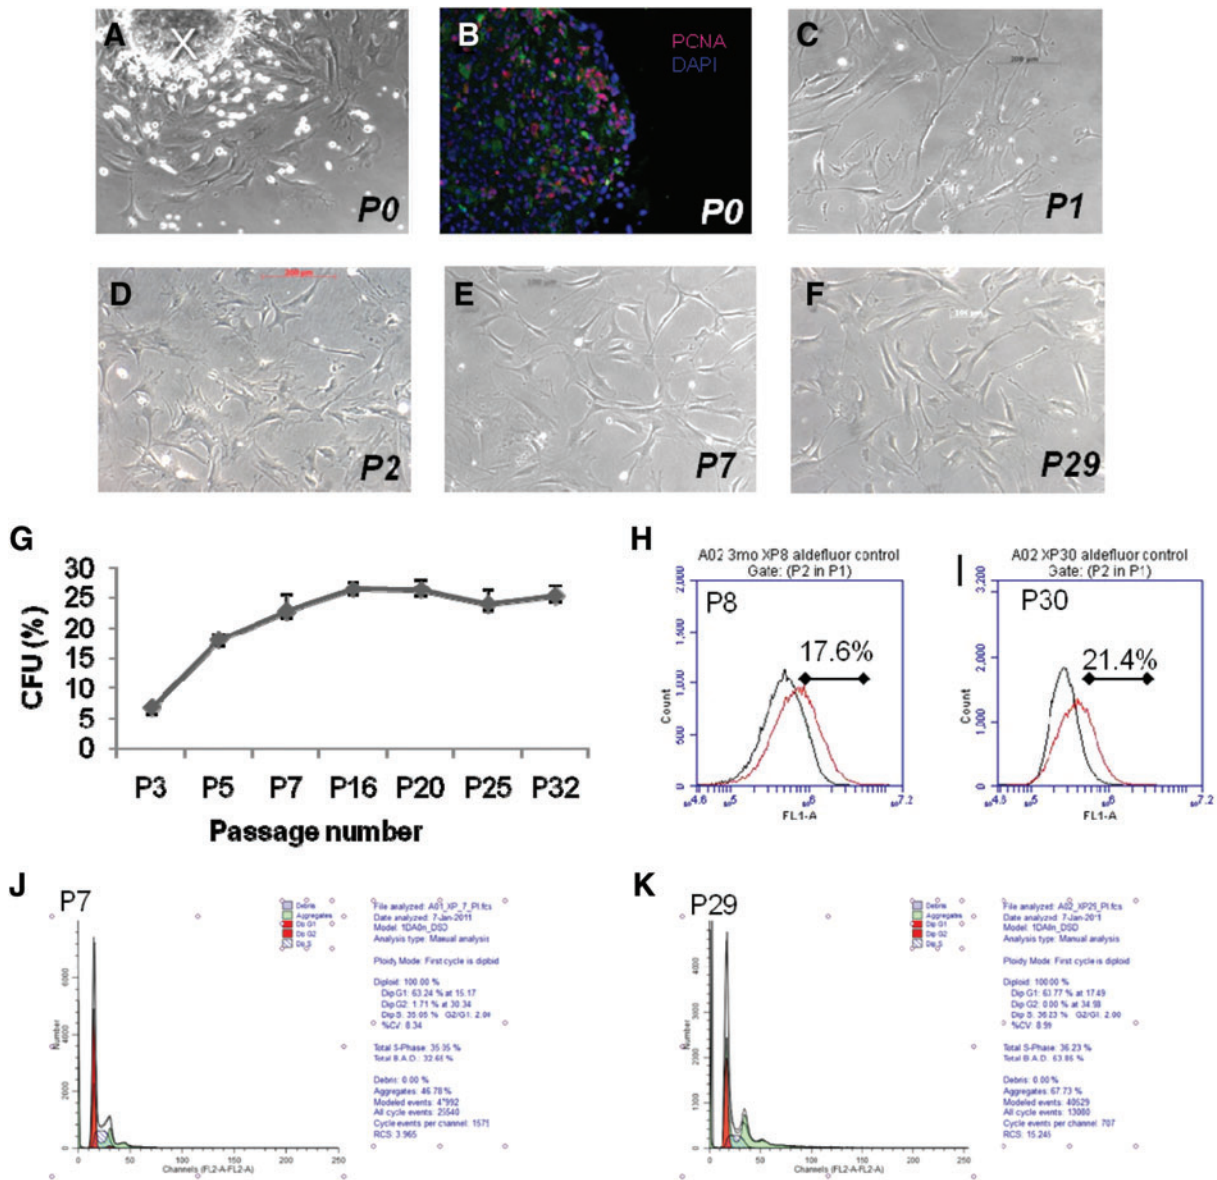

**SUPPLEMENTARY FIG. S1.** Morphology, clonogenicity, aldehyde dehydrogenase expression, and ploidy of early versus late passage L-MSCs. (A) Explants ("X") yielded primarily fibroblastic cells when grown on plastic in minimal media (alpha MEM, 15% FBS), 50 $\times$ ; initial growth is designated as passage 0 (P0), day 7. (B) Proliferative (PCNA<sup>POS</sup>) cells on day 7 are seen in the explants tissue migrating toward the edge, 50 $\times$ ; the exact in vivo location could not be established by this technique due to atelectasis of tissues. (C) Outgrowth cells show heterogeneity in size and morphology (crescent, spindle, and stellate-shaped cells) in P1 and P2 (C, D), but from P7 to P29 (E, F) crescent-shaped cells predominated. (G) Colony-forming units (% of 2,000 cells/plate,  $n=3$  plates/experiment) from P3 to P32 show a significant increase and plateau from P3 to P7; P7 cells were used for in vitro and transplantation assays due to greater consistency in CFU (%) and morphology. (H, I) Aldehyde dehydrogenase (ALDH; Aldefluor, Stem Cell Technologies)-positive cells at P7 versus P30, which shown similar profiles. Note that the percentage of ALDH<sup>POS</sup> L-MSCs is similar to CFU (%). (J, K) Analysis of cell cycle kinetics showing that  $\sim 35\%$  of P7 or P29 cells were in S phase and  $\sim 100\%$  of P7 or P29 cells were diploid; cell cycle data were acquired on Accuri C6 (100,000 events) and analyzed using commercial software (ModFit). FBS, fetal bovine serum; L-MSCs, lung-derived mesenchymal stromal cells; FBS, fetal bovine serum; CFU, colony-forming units; MEM, minimum essential media.

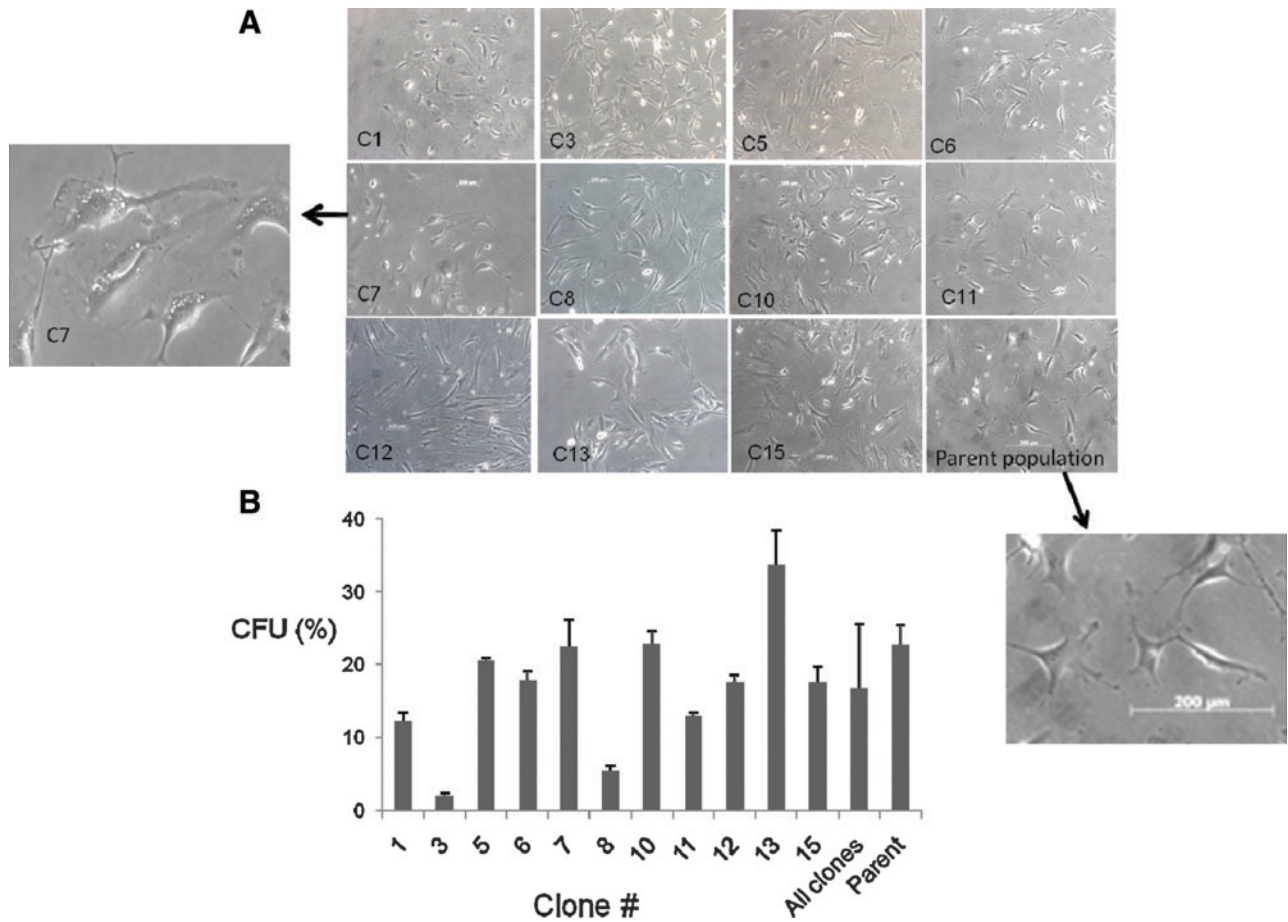

**SUPPLEMENTARY FIG. S2.** Morphologic appearance and colony-forming efficiency of clones derived from L-MSCs parent population (passage 4) by limited dilution. **(A)** Panel of phase-contrast photomicrographs (100 $\times$ ) showing subtle variation in distribution of morphologies (at passage 7) of clones (identified in *lower left corner*). Variation in morphology from crescent-shaped (eg, C3, C6) to more spindle-shaped (eg, C5, C12) cells with rare myofibroblastic stellate cells are noted in clones cultured identically; one clone (C7) exhibited lipid vesicles in their cytoplasm (also see enlarged photomicrograph to *left of panel*). The parent population typically contained a mixture of morphologies as did clonal populations after serial passage, suggesting that variation in morphology is an intrinsic property of each subculture. **(B)** Colony-forming efficiency varied considerably between clones ( $\sim 3\%$ – $35\%$ ); the mean  $\pm$  standard deviation of all clonal CFUs versus the parent population ( $n=3$  replicates) were very similar; therefore, the parent L-MSCs contain subsets of L-MSCs with marked differences in CFU.

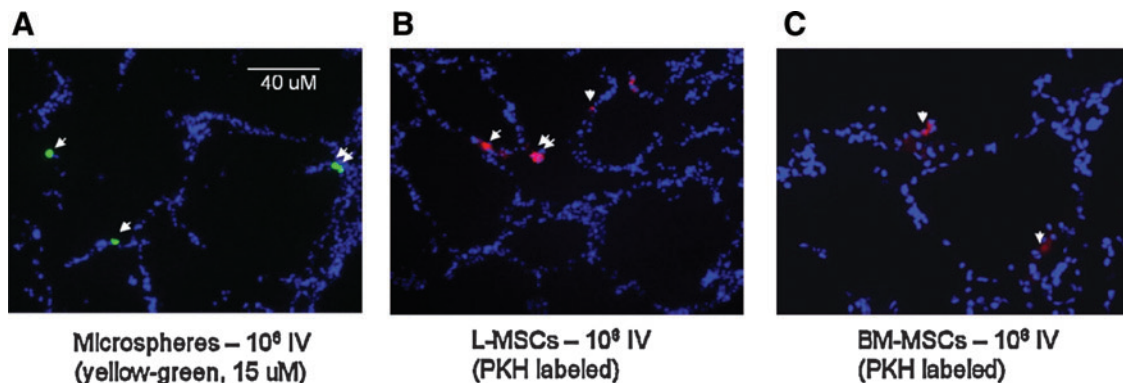

**SUPPLEMENTARY FIG. S3.** Low magnification (100 $\times$ ) photomicrographs of lung cryosections from mice with chronic emphysema that were euthanized immediately after injection with 1 million **(A)** 15  $\mu$ M microspheres (yellow-green fluorochrome, Invitrogen), or PKH26-labeled **(B)** L-MSCs, or **(C)** BM-MSCs. Cells were found to distribute randomly, independent of the extent of elastase injury. In cryosections (10  $\mu$ M) they were found as singlets (*single arrows*) or small clusters (2–3 cells, *double arrows*) at low density (1–2/hpf), similar to the distribution of microspheres. hpf, high powered field.

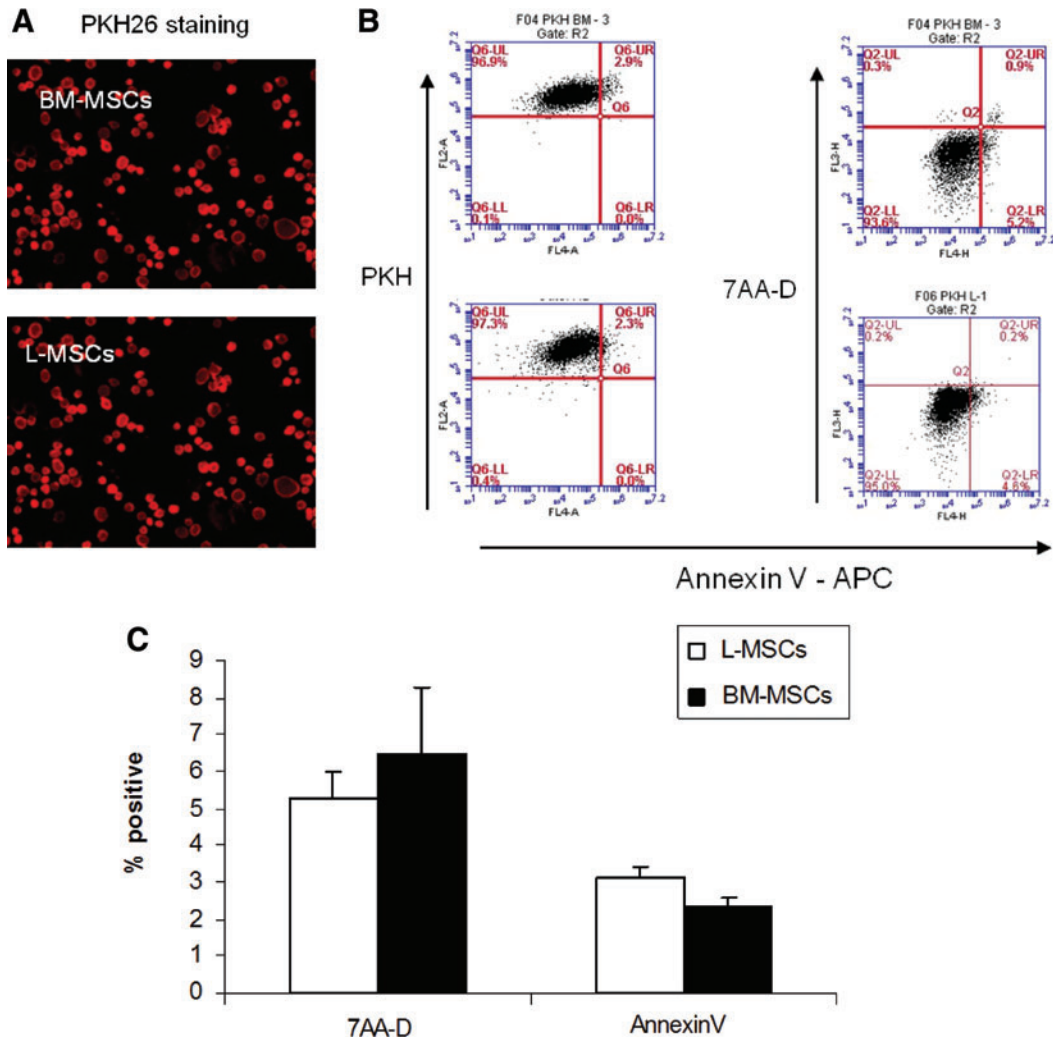

**SUPPLEMENTARY FIG. S4.** Effect of PKH cell-labeling procedure on survival and apoptosis in L-MSCs versus BM-MSCs. Cells were labeled (5 min) with PKH26 (Sigma) according to the manufacturer's recommendations. The intensity of staining was equivalent for cell lines (A, B). There was no effect of PKH26 labeling on the incidence of apoptosis (Annexin V<sup>POS</sup>, Annexin V staining kit, eBioscience) or cell death (7AA-D<sup>POS</sup>) in L-MSCs and BM-MSCs (C). APC, allophycocyanin.

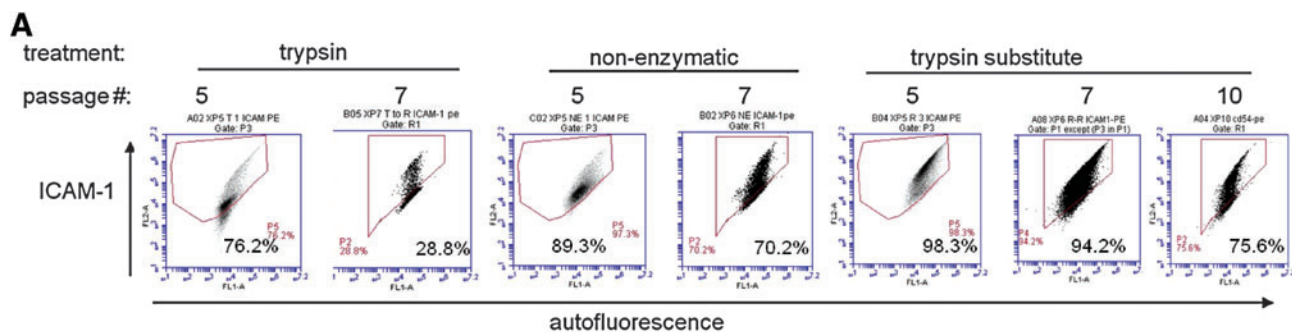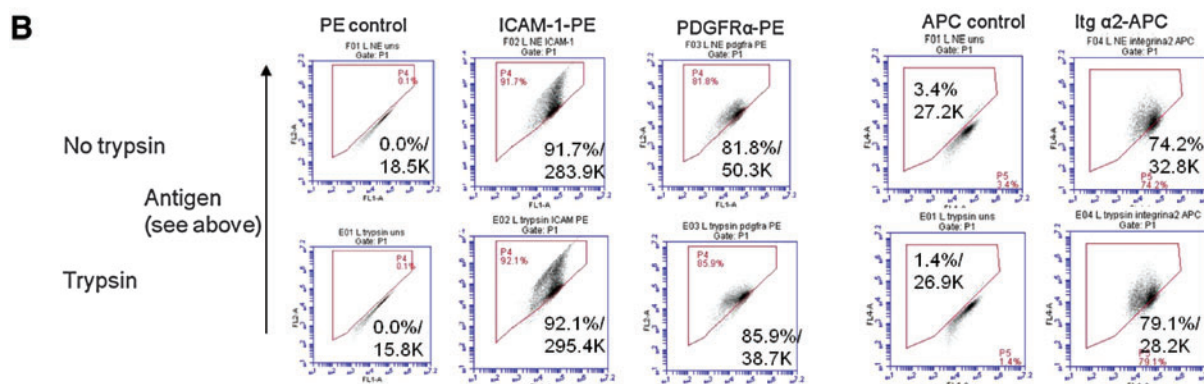

**SUPPLEMENTARY FIG. S5.** Effect of trypsin harvest of L-MSCs on ICAM-1 expression and detection. **(A)** Trypsin was used at each passage (1–7) and caused a marked diminution of ICAM-1 expression when compared with the effects of passaging with either a nonenzymatic reagent (Enzyme-free cell dissociation; Millipore) or nonanimal–nonhuman origin trypsin substitute (TrypLE Express; Invitrogen), the latter of which maintained high (>75% positive) ICAM-1 expression to at least passage 10. **(B)** Detection of ICAM-1, PDGFR $\alpha$ , and Itg  $\alpha$ 2 was not affected by harvesting cells with trypsin/ethylenediaminetetraacetic acid. ICAM-1, intercellular adhesion molecule 1; PDGFR $\alpha$ , platelet derived growth factor.

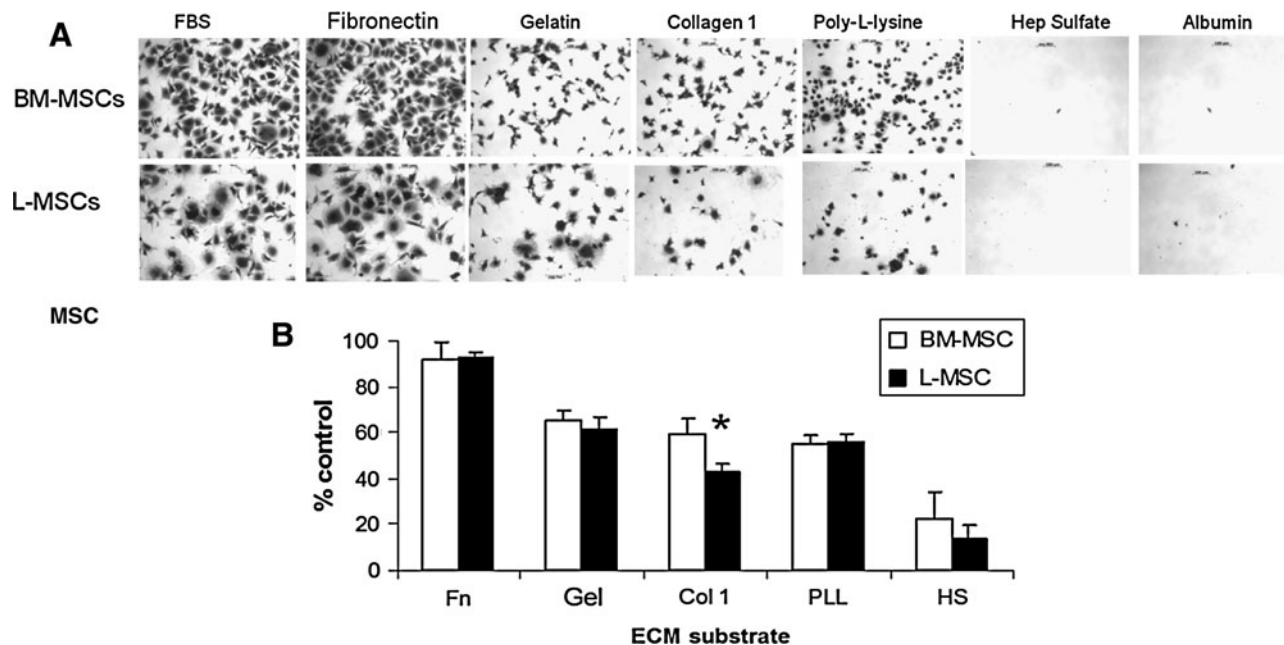

**SUPPLEMENTARY FIG. S6.** Comparison between L-MSCs and BM-MSCs for extracellular matrix substrate binding on precoated tissue culture plates (20  $\mu$ g/mL, 1 h, 23°C). **(A, B)** These binding assays revealed that L-MSCs bound collagen 1 less avidly ( $*P < 0.05$ ) than BM-MSCs, but adherence to other common matrix proteins was not statistically different. Fn, fibrinogen; Gel, gelatin; Col 1, collagen 1; PLL, poly-L-lysine; HS, heparin sulfate; FBS and albumin are shown as positive and negative controls, respectively **(A)**.

SUPPLEMENTARY TABLE S1. DIFFERENTIATION ASSAYS WERE PERFORMED ON LUNG-DERIVED MESENCHYMAL STROMAL CELLS CULTURED AS DESCRIBED IN THE METHODS

| <i>Gene symbol</i>               | <i>Gene name</i>                                   | <i>Primer catalog number</i> | <i>Fold change</i> | <i>P</i> |
|----------------------------------|----------------------------------------------------|------------------------------|--------------------|----------|
| Alveolar epithelial type I cell  |                                                    |                              |                    |          |
| Aqp5                             | Aquaporin 5                                        | PPM29204A                    | 3.05               | <0.01    |
| Clara cell                       |                                                    |                              |                    |          |
| Scgb1A1                          | Clara cell secretory protein                       | PPM05626B                    | 5.06               | <0.005   |
| Alveolar epithelial type II cell |                                                    |                              |                    |          |
| Sftpc                            | Pro-surfactant protein C                           | PPM26536A                    | 0.06               | N/S      |
| Ttf-1                            | Transcription termination factor, RNA polymerase I | PP35192AM                    | 1.31               | N/S      |
| Endothelial cell                 |                                                    |                              |                    |          |
| CD31                             | Platelet endothelial cell adhesion molecule        | PPM03802C                    | 1.02               | N/S      |
| Cdh5                             | CD144/VE Cadherin                                  | PPM03797B                    | 1.43               | N/S      |
| Flk-1                            | Kinase insert domain protein receptor              | PPM03057A                    | -2.37              | <0.01    |
| Vwf                              | von Willebrand factor                              | PPM05310E                    | 2.50               | <0.005   |
| Smooth muscle cell               |                                                    |                              |                    |          |
| Des                              | Desmin                                             | PPM25379A                    | 3.75               | <0.0001  |
|                                  |                                                    |                              | 3.75               |          |
| MyoD1                            | Myogenic differentiation 1                         | PPM04481A                    | 7.6                | <0.005   |
| Acta2                            | $\alpha$ smooth muscle actin                       | PPM04483A                    | 4.11               | <0.0001  |
| Adipocyte                        |                                                    |                              |                    |          |
| Lpl                              | Lipoprotein lipase                                 | PPM04353E                    | 109.4              | <0.0001  |
| Fabp4                            | Fatty acid binding protein                         | PPM04517A                    | 1.14               | N/S      |
| Ppar $\gamma$                    | Peroxisome proliferator activated receptor gamma   | PPM05108B                    | 26.6               | <0.0001  |

Transcription was measured using quantitative real-time PCR. *P* values represent analysis of mean  $C_t$  values using independent *t*-tests and Bonferroni adjustment of *P* value (<0.01 considered significant). PCR, polymerase chain reaction.

SUPPLEMENTARY TABLE S2. EFFECT OF TRANSFORMING GROWTH FACTOR BETA 1 ON LUNG-DERIVED MESENCHYMAL STROMAL CELLS EXPRESSION OF GENES ENCODING PROTEINS RELATED TO LUNG-DERIVED MESENCHYMAL STROMAL CELLS DIFFERENTIATION TO MYOFIBROBLASTS, FIBROBLAST ACTIVATION, SURVIVAL, AND SENESCENCE

| <i>Gene symbol</i> | <i>Gene name</i>                    | <i>Primer catalog number</i> | <i>Fold change</i> | <i>P</i> |
|--------------------|-------------------------------------|------------------------------|--------------------|----------|
| Acta2              | $\alpha$ smooth muscle actin        | PPM04483A                    | 1.8                | 0.025    |
| Col1A1             | Collagen 1                          | PPM03845F                    | 2.8                | 0.001    |
| Fn1                | Fibronectin                         | PPM03786A                    | 2.2                | 0.000    |
| Lox                | Lysyl-oxidase                       | PPM04652A                    | 2.5                | 0.000    |
| Mmp9               | Matrix metalloprotease-9            | PPM03661B                    | 50.4               | 0.000    |
| Tnc                | Tenascin                            | PPM03804E                    | 2.0                | 0.000    |
| Tnrsf12A           | TweakR                              | PPM27298A                    | 1.9                | 0.000    |
| Dpp4               | Dipeptidyl-peptidase 4/CD26         | PPM05502A                    | -3.0               | 0.012    |
| Fap $\alpha$       | Fibroblast-activating protein       | PPM28904A                    | 1.0                | 0.879    |
| S100A4             | Fibroblast specific protein 1       | PPM03811A                    | -2.1               | 0.001    |
| Birc5              | Baculoviral IAP repeat containing 5 | PPM03431B                    | -2.0               | 0.001    |
| Mdk                | Midkine                             | PPM03800B                    | -1.3               | 0.033    |
| Cdkn1a             | Cyclin dependent kinase 1a/p21      | PPM02901A                    | 1.5                | 0.029    |
| Tp53               | Tumor protein 53                    | PPM02931B                    | 1.4                | 0.000    |

Passage 7 L-MSCs previously incubated in serum-free media (6 h) were exposed to human recombinant TGF $\beta$ 1 (10 ng/mL, R&D Systems) or PBS vehicle (48 h). Samples were run in triplicate by quantitative real-time PCR using commercial primers (SA Biosciences) as shown; fold differences (TGF $\beta$ 1/control) are reported in association with *P* value (<0.05 considered significant); the average mRNA expression of housekeeping genes *Hprt1*, *GusB*, *GAPDH* was used to normalize data. TGF $\beta$ 1-induced genes associated with myofibroblastic phenotype, but not activation. Survival genes were significantly suppressed and senescence associated genes activated, consistent with terminal differentiation by TGF $\beta$ 1. L-MSCs, lung-derived mesenchymal stromal cells; FBS, fetal bovine serum; PBS, phosphate-buffered saline; GAPDH, glyceraldehyde 3-phosphate dehydrogenase; TGF $\beta$ 1, transforming growth factor beta 1.

SUPPLEMENTARY TABLE S3. GENE EXPRESSION ARRAYS COMPARING mRNA EXPRESSION BY QUANTITATIVE REAL-TIME POLYMERASE CHAIN REACTION IN LUNG-DERIVED MESENCHYMAL STROMAL CELLS VERSUS BONE MARROW-DERIVED MESENCHYMAL STROMAL CELLS (P7), EMPLOYING 3 COMMERCIAL ARRAYS THAT WERE FOCUSED ON EXTRACELLULAR MATRIX GENES (PAMM-13, SA BIOSCIENCES), GROWTH FACTORS (PAMM-043, SA BIOSCIENCES), OR CHEMOKINE/CYTOKINE (PAMM-022, SA BIOSCIENCES) SIGNALING

| ECM array                  |                    |                | Growth factor array        |             |          | Chemokine/Cytokine array   |             |          |
|----------------------------|--------------------|----------------|----------------------------|-------------|----------|----------------------------|-------------|----------|
| Gene                       | Fold change        | P value        | Gene                       | Fold change | P value  | Gene                       | Fold change | P value  |
| <i>L-MSC over-express</i>  |                    |                | <i>L-MSC over-express</i>  |             |          | <i>L-MSC over-express</i>  |             |          |
| Adamts1                    | 4.065              | 0.01291        | Artn                       | 3.067       | 0.035058 | Bmp6                       | 4.317       | 0.020665 |
| Adamts2                    | 2.561              | 0.0033         | Bdnf                       | 2.139       | 0.017743 | <u>Ccl2</u>                | 19.338      | 0.011608 |
| Ctnna1                     | 1.610              | 0.02682        | Bmp4                       | 2.682       | 0.026182 | <u>Ccl5</u>                | 19.027      | 0.013155 |
| Ctnnb1                     | 1.761              | 0.01117        | Bmp6                       | 4.065       | 0.017484 | Ccl7                       | 20.112      | 0.01486  |
| Col3a1                     | 1.502              | 0.04543        | Csf1                       | 1.505       | 0.019377 | Ccl9                       | 4.357       | 0.016915 |
| Emilin1                    | 3.227              | 0.00336        | Csf2                       | 8.714       | 0.006229 | <u>Ccll2</u>               | 4.779       | 0.017255 |
| Fbln1                      | 13.674             | 7.8E-05        | Cxcl1                      | 23.807      | 0.001595 | Cmtm3                      | 2.802       | 0.02651  |
| Icam1                      | 69.391             | 0.00086        | Cxcl12                     | 6.997       | 0.000108 | <u>Cxcr7</u>               | 62.683      | 0.013626 |
| Itga2                      | 3.403              | 0.0025         | Ereg                       | 3.110       | 0.003191 | Csf2                       | 16.074      | 0.011197 |
| Itgb2                      | 3.466              | 0.01212        | Fgf11                      | 1.414       | 0.010363 | Cxcl1                      | 29.651      | 0.002251 |
| Itgb3                      | 2.292              | 0.00652        | <u>Fgf18</u>               | 20.726      | 0.000177 | <u>Cxcl10</u>              | 62.394      | 0.011909 |
| Lama1                      | 3.927              | 0.03236        | Figf                       | 26.416      | 0.000307 | Cxcl11                     | 3.490       | 0.039062 |
| Lama3                      | 2.670              | 0.0218         | Gdnf                       | 10.267      | 0.000153 | Cxcl12                     | 4.681       | 0.028183 |
| Lamb2                      | 2.080              | 0.00268        | <u>Hgf</u>                 | 15.313      | 0.000035 | <u>Cxcl2</u>               | 36.085      | 0.000276 |
| Lamc1                      | 1.828              | 0.00462        | Igf2                       | 86.223      | 0.000041 | Cxcl9                      | 1.968       | 0.005476 |
| Mmp13                      | 9.647              | 0.00423        | <u>Il11</u>                | 6.981       | 0.012981 | Il18                       | 2.457       | 0.002076 |
| Mmp14                      | 2.179              | 0.01661        | Il18                       | 2.189       | 0.016084 | Lif                        | 1.737       | 0.046443 |
| Mmp3                       | 80.263             | 0.00125        | <u>Il6</u>                 | 24.196      | 0.000002 | Myd88                      | 6.262       | 0.000073 |
| Postn                      | 8.301              | 0.00103        | Kitl                       | 3.418       | 0.000968 | Nfkb1                      | 1.786       | 0.002087 |
| Selp                       | 49.522             | 0.00238        | Lefty1                     | 17.268      | 0.000137 | Slit2                      | 3.395       | 0.000017 |
| Sgce                       | 2.633              | 0.00305        | Lif                        | 1.505       | 0.000768 | Tlr4                       | 1.819       | 0.000518 |
| Thbs2                      | 4.490              | 0.00585        | Ngf                        | 2.119       | 0.001635 | Tnfrsf1a                   | 1.853       | 0.001733 |
| Thbs3                      | 3.515              | 0.01858        | Pgf                        | 5.762       | 0.000001 |                            |             |          |
| Vcam1                      | 1.606              | 0.04023        | Rabep1                     | 2.129       | 0.003205 |                            |             |          |
| Gene                       | <i>Fold change</i> | <i>P value</i> | Vegfa                      | 1.888       | 0.005948 | <i>BM-MSc over-express</i> |             |          |
|                            |                    |                | Vegfb                      | 3.450       | 0.008254 | Ccl17                      | 2.770       | 0.043895 |
|                            |                    |                | Vegfc                      | 1.537       | 0.019247 | Cx3cl1                     | 3.613       | 0.000466 |
|                            |                    |                |                            |             |          | Ppbp                       | 3.531       | 0.001449 |
| <i>BM-MSc over-express</i> |                    |                | <i>BM-MSc over-express</i> |             |          | Inhbb                      | 10.459      | 0.000126 |
| Col2a1                     | 4.056              | 0.02636        | Igf1                       | 2.139       | 0.013488 | Mmp2                       | 3.024       | 0.000015 |
| Col6a1                     | 1.434              | 0.04734        | Inhba                      | 4.327       | 0.011562 |                            |             |          |
| Ctgf                       | 3.991              | 0.0007         | Inhbb                      | 13.801      | 0.010316 |                            |             |          |
| Ecm1                       | 1.741              | 0.00679        | S100a6                     | 2.567       | 0.000105 |                            |             |          |
| Itga3                      | 9.084              | 0.00502        | <u>Spp1</u>                | 44.017      | 0.000372 |                            |             |          |
| Itga5                      | 3.597              | 0.00015        | Tgfb2                      | 4.209       | 0.000038 |                            |             |          |
| Ncam1                      | 1.613              | 0.00831        | Tgfb3                      | 1.807       | 0.001317 |                            |             |          |
| Mmp2                       | 2.701              | 0.00102        |                            |             |          |                            |             |          |
| <u>Spp1</u>                | 34.776             | 0.00081        |                            |             |          |                            |             |          |
| Thbs1                      | 1.566              | 0.01626        |                            |             |          |                            |             |          |
| Tnc                        | 8.938              | 0.01582        |                            |             |          |                            |             |          |

Primer sequences are available at the SA Biosciences Web site: ([www.sabiosciences.com/ArrayList.php?pline=PCRArray](http://www.sabiosciences.com/ArrayList.php?pline=PCRArray)). Samples were performed in triplicate. Shown are fold changes ("Fold change," L-MSCs/BM-MSCs) for each gene. The average mRNA expression of housekeeping genes *GusB* and *GADPH* was used to normalize these data. Genes selected for further analysis of paracrine signals in vivo are shown in boxes;  $P < 0.05$  was considered significant. BM-MSCs, bone marrow-derived mesenchymal stromal cells; ECM, extracellular matrix.

SUPPLEMENTARY TABLE S4. LIST OF GENES AND PRIMERS USED IN QUANTITATIVE REAL-TIME POLYMERASE CHAIN REACTION ANALYSIS OF mRNA EXPRESSION IN WHOLE LUNG TISSUES TRANSPLANTATED WITH LUNG-DERIVED MESENCHYMAL STROMAL CELLS, BONE MARROW-DERIVED MESENCHYMAL STROMAL CELLS, OR PHOSPHATE-BUFFERED SALINE IN VIVO

| <i>Gene symbol</i> | <i>Gene name</i>              | <i>Primer catalog number</i> |
|--------------------|-------------------------------|------------------------------|
| Ccl2               | Chemokine C-C motif ligand 2  | PPM03151F                    |
| Ccl5               | Chemokine C-C motif ligand 5  | PPM02960E                    |
| Cxcl2              | Chemokine CXC motif ligand 2  | PPM02969E9E                  |
| Cxcl10             | Chemokine CXC motif ligand 10 | PPM02978D                    |
| Cxcl12             | Chemokine CXC motif ligand 12 | PPM02965E                    |
| Cxcr7              | Chemokine CXC receptor type 7 | PPM03179A                    |
| Fgf18              | Fibroblast growth factor 18   | PPM03046B                    |
| Hgf                | Hepatocyte growth factor      | PPM02953C                    |
| Igf2               | Insulin-like growth factor 2  | PPM03655A                    |
| S100A4             | Fibroblast specific protein 1 | PPM03811A                    |
| IL-6               | Interleukin 6                 | PPM03015A                    |
| IL-11              | Interleukin 11                | PPM03018E                    |
| Spp1               | Secreted phosphoprotein 1     | PPM03648C                    |

Results are summarized in Fig. 7A.
